# Supplementary material for: Large-scale production of MXenes as nanoknives for antibacterial application
Source: Royal Society of Chemistry journal article supplement (doi:10.1039/d3na00744h), 2023-01-01
Supplement: d3na00744h1.pdf [file d3na00744h1.pdf]

**Electronic Supplementary Material (ESI) for Nanoscale Advances.**

## **Supporting Information**

### **Large-scale production of MXenes as nanoknives for antibacterial application**

Yuchen Liu,<sup>a, b</sup> Xing Chen,<sup>c</sup> Jiazhi Sun,<sup>c</sup> Nuo Xu,<sup>a</sup> Qi Tang,<sup>a</sup> Jie Ren,<sup>a</sup> Cheng Chen,<sup>\*a</sup> Weiwei Lei,<sup>\*b</sup> Chao Zhang<sup>a</sup> and Dan Liu<sup>\*b</sup>

<sup>a</sup>School of Resources and Environment, Anhui Agricultural University, 130 Changjiang West Road, Hefei, 230036, Anhui, China

<sup>b</sup>Institute for Frontier Materials, Deakin University, Locked Bag 2000, Geelong, Victoria 3220, Australia

<sup>c</sup>Key Laboratory of Integrated Crop Pest Management of Anhui Province, School of Plant Protection, Anhui Agricultural University, Hefei 230036, China

\*Correspondence: [chc@ahau.edu.cn](mailto:chc@ahau.edu.cn); [weiwei.lei@deakin.edu.au](mailto:weiwei.lei@deakin.edu.au); [dan.liu@deakin.edu.au](mailto:dan.liu@deakin.edu.au)

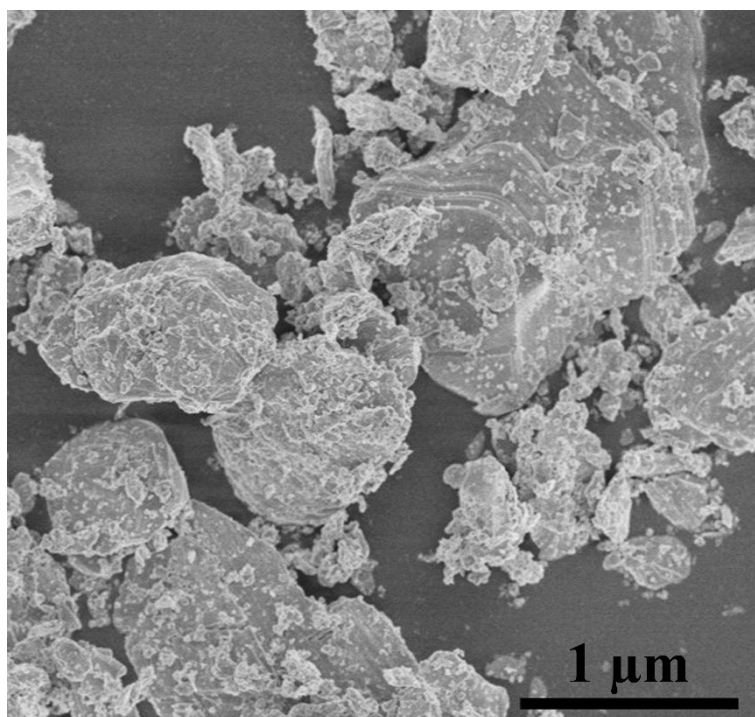

**Fig. S1** Scanning electron microscopy image of the pristine  $\text{Ti}_3\text{AlC}_2$  MAX phase.

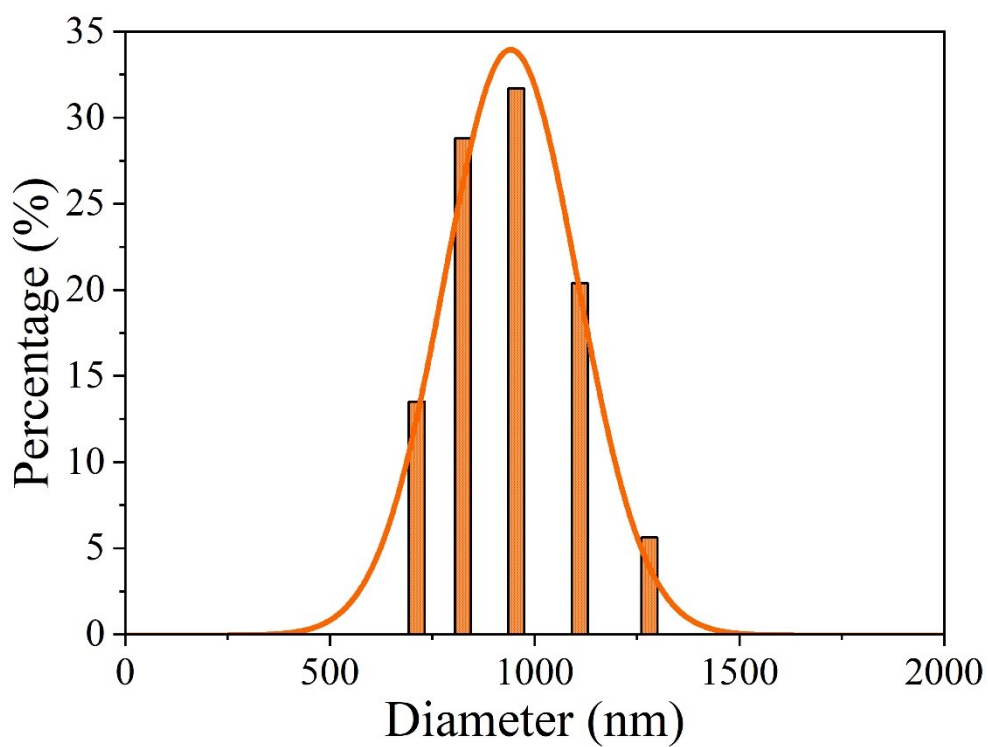

**Fig. S2** The size distribution of the prepared E- $\text{Ti}_3\text{C}_2$  MXene nanosheets.

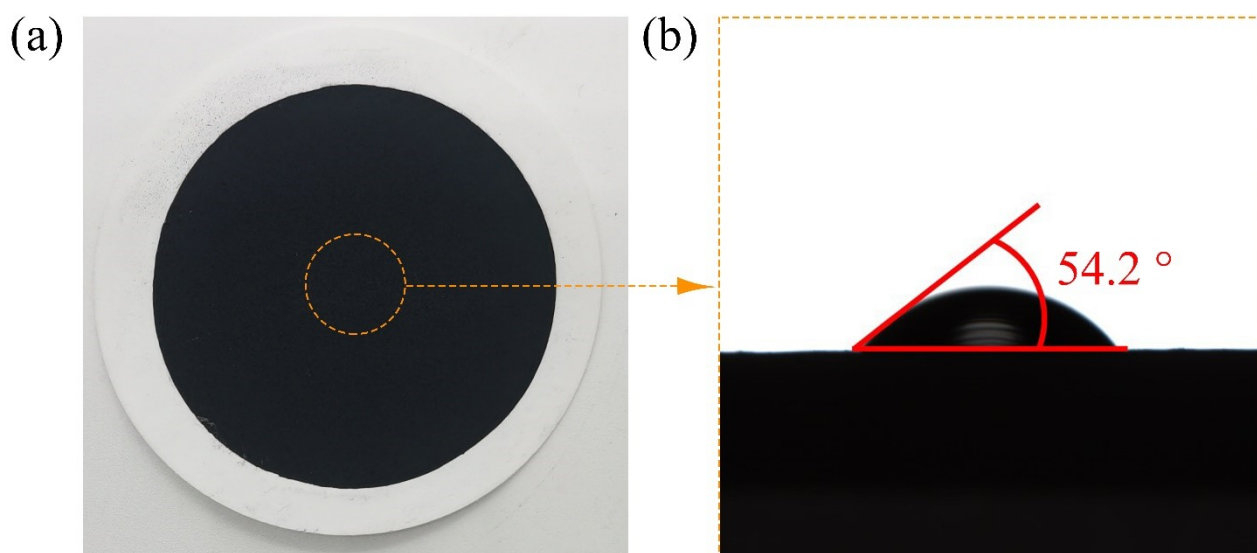

**Fig. S3** (a) Digital photo of E-Ti<sub>3</sub>C<sub>2</sub> on a nylon substrate. (b) Water contact angle of E-Ti<sub>3</sub>C<sub>2</sub> on a nylon substrate.

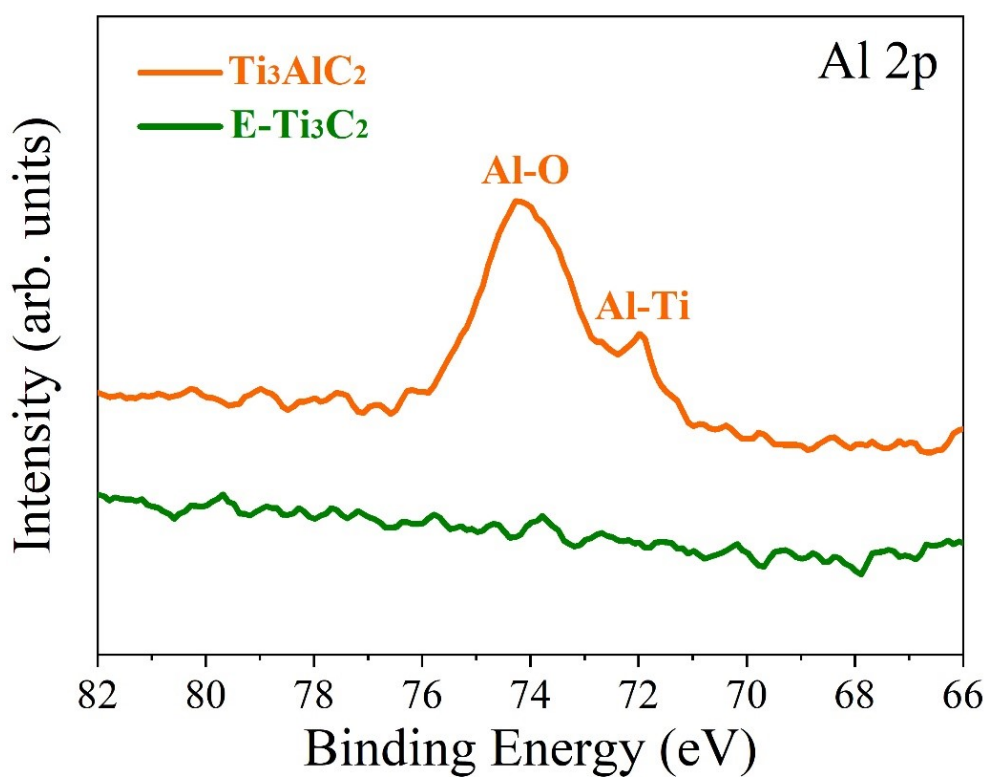

**Fig. S4** High-resolution X-ray photoelectron spectroscopy results of the pristine Ti<sub>3</sub>AlC<sub>2</sub> MAX phase and E-Ti<sub>3</sub>C<sub>2</sub> in the Al 2p region.

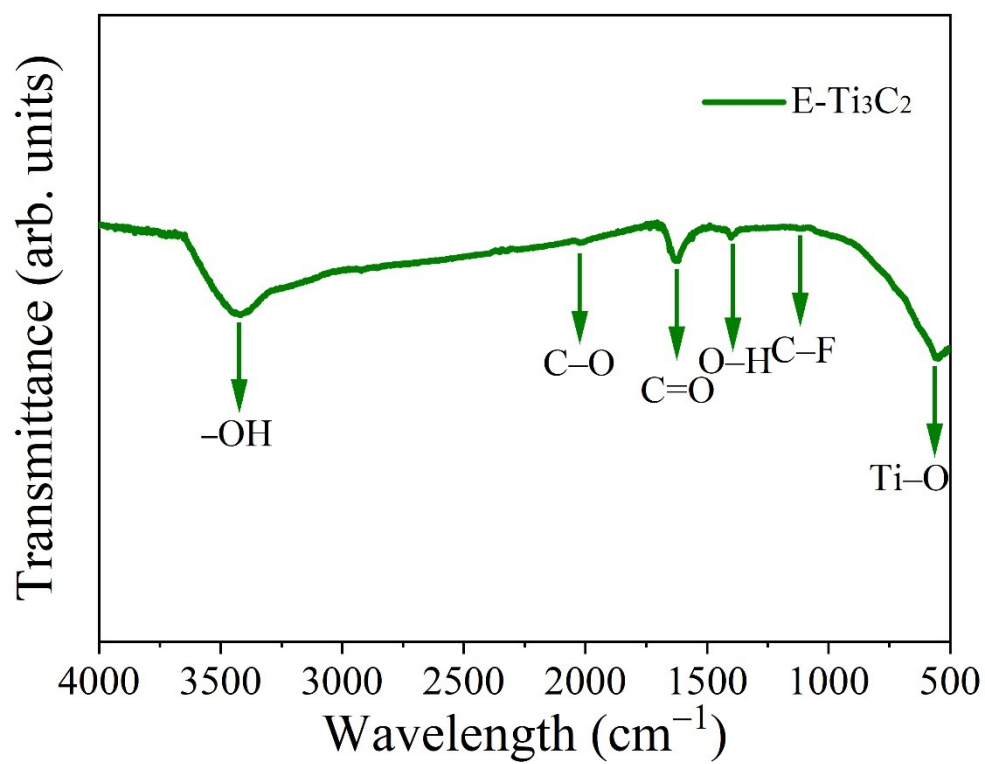

**Fig. S5** Fourier transform infrared spectrum of the E-Ti<sub>3</sub>C<sub>2</sub> MXene.

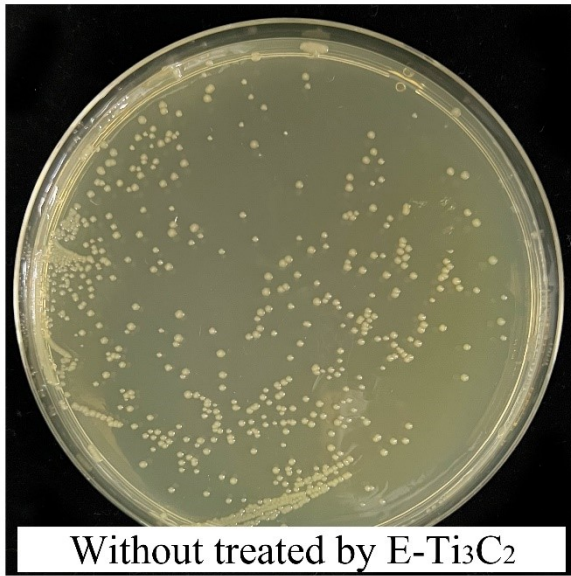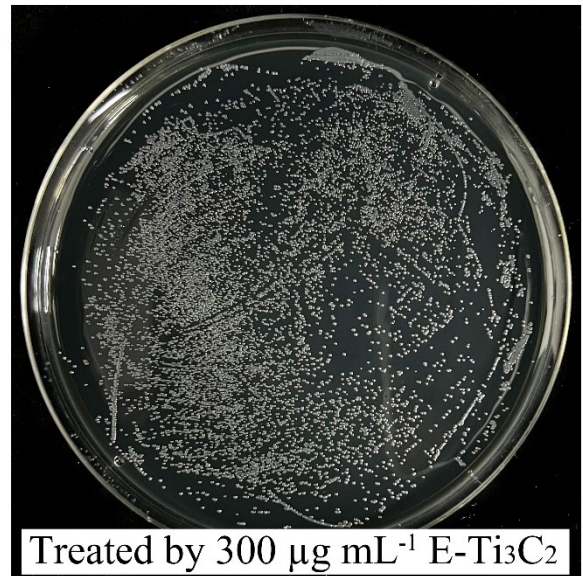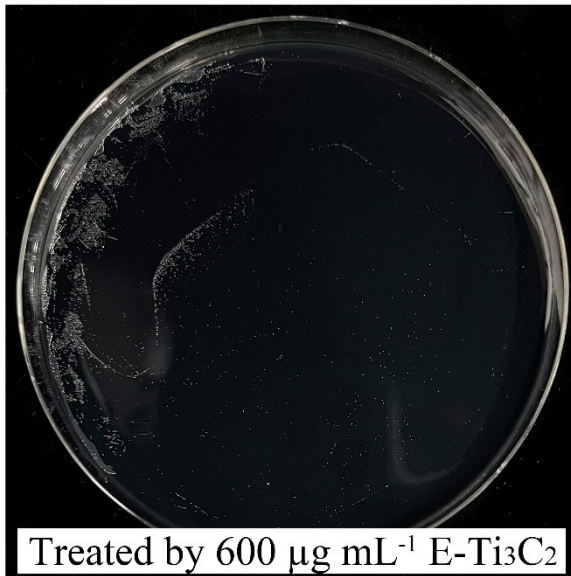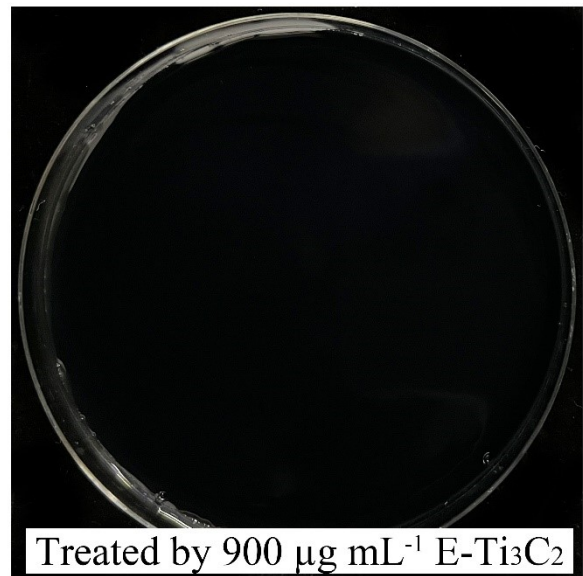

**Fig. S6** Photographs of the first replicate samples of *E. coli* incubated in non-E-Ti<sub>3</sub>C<sub>2</sub>-treated and E-Ti<sub>3</sub>C<sub>2</sub>-treated LB media for 12 hours.



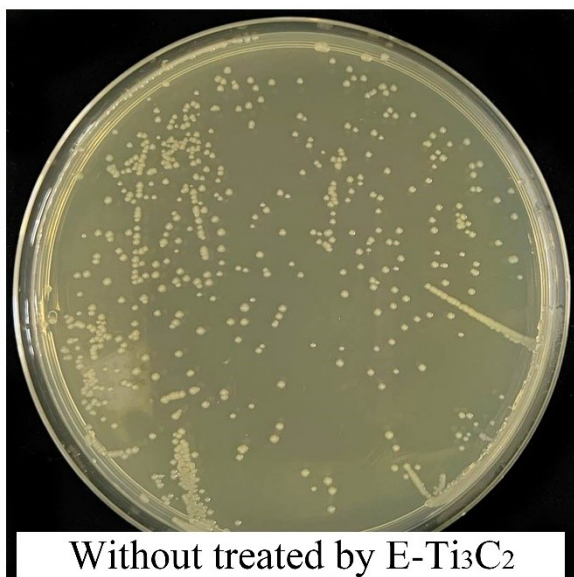

Without treated by E-Ti<sub>3</sub>C<sub>2</sub>

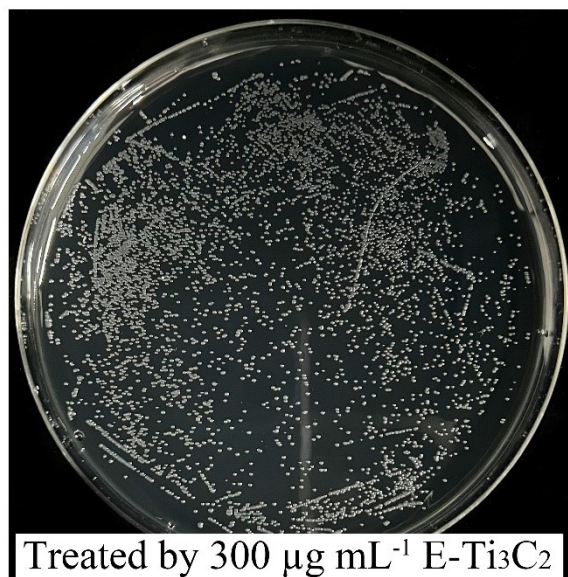

Treated by 300 µg mL<sup>-1</sup> E-Ti<sub>3</sub>C<sub>2</sub>

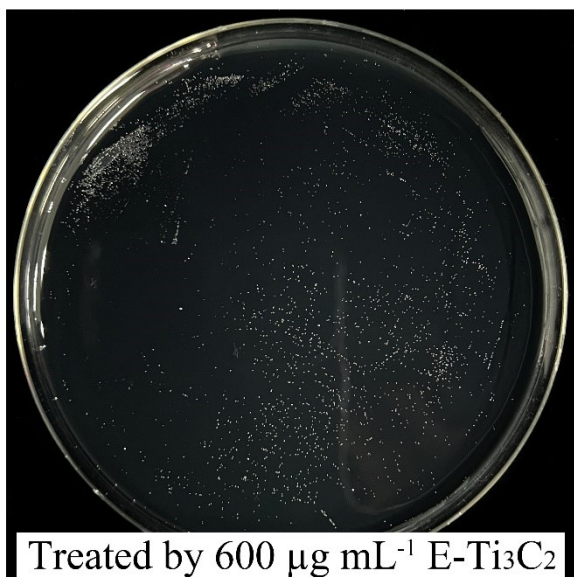

Treated by 600 µg mL<sup>-1</sup> E-Ti<sub>3</sub>C<sub>2</sub>

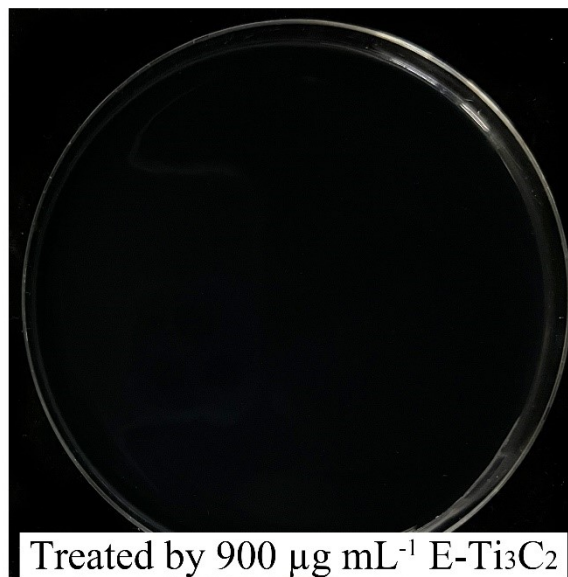

Treated by 900 µg mL<sup>-1</sup> E-Ti<sub>3</sub>C<sub>2</sub>

**Fig. S7** Photographs of the second replicate samples of *E. coli* incubated in non-E-Ti<sub>3</sub>C<sub>2</sub>-treated and E-Ti<sub>3</sub>C<sub>2</sub>-treated LB media for 12 hours.

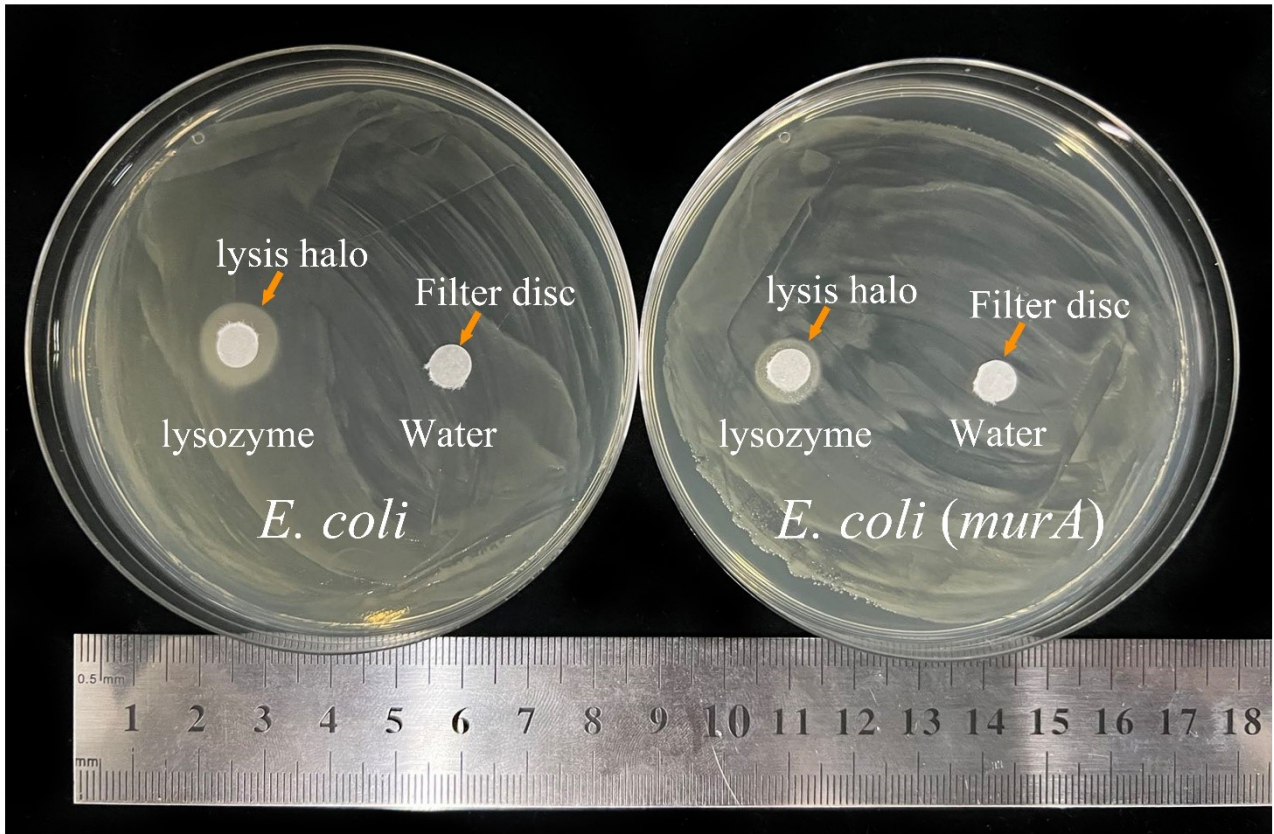

**Fig. S8** Magnitude of the lysis halo from the same dose of lysozyme on *E. coli* with thickened (right) and normal cell walls (left).



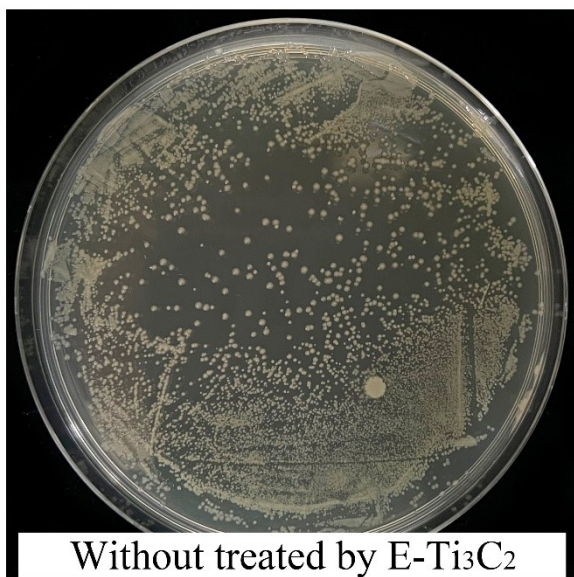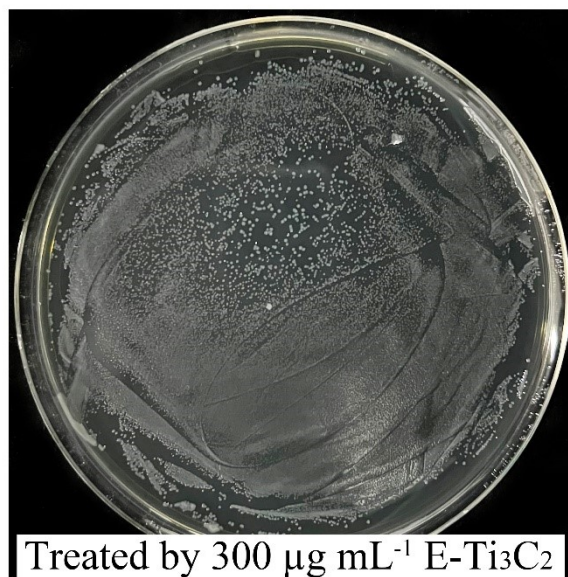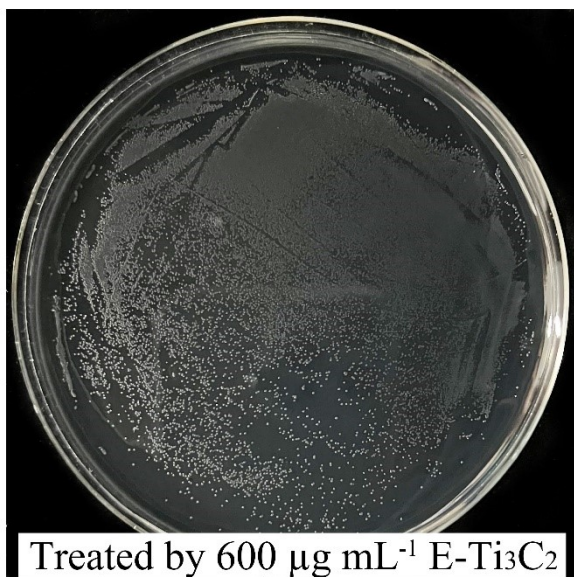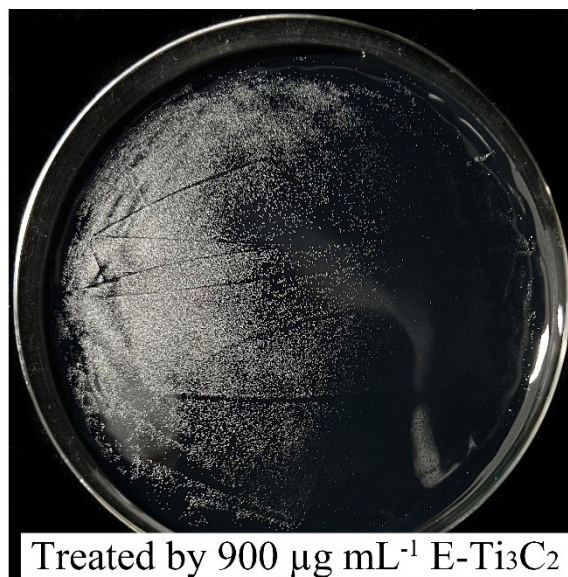

**Fig. S9** Photographs of the first replicate samples of *E. coli* with thickened cell walls, incubated in non-E-Ti<sub>3</sub>C<sub>2</sub>-treated and E-Ti<sub>3</sub>C<sub>2</sub>-treated LB media for 12 hours.



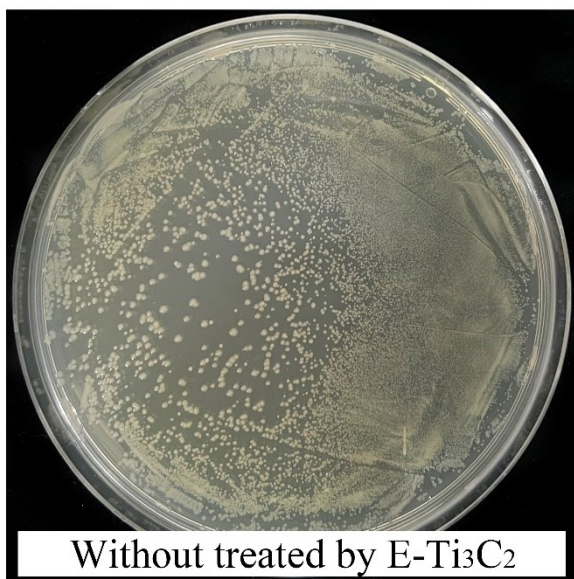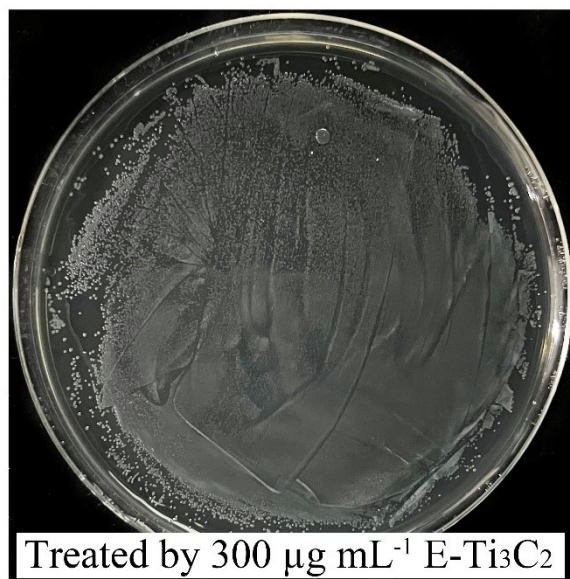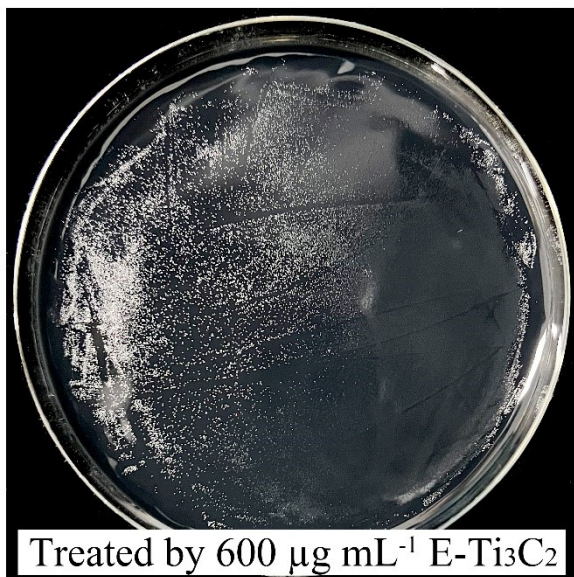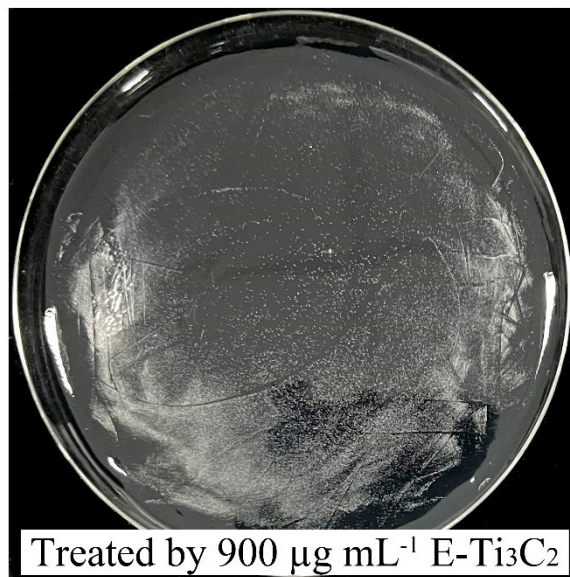

**Fig. S10** Photographs of the second replicate samples of *E. coli* with thickened cell walls, incubated in non-E-Ti<sub>3</sub>C<sub>2</sub>-treated and E-Ti<sub>3</sub>C<sub>2</sub>-treated LB media for 12 hours.



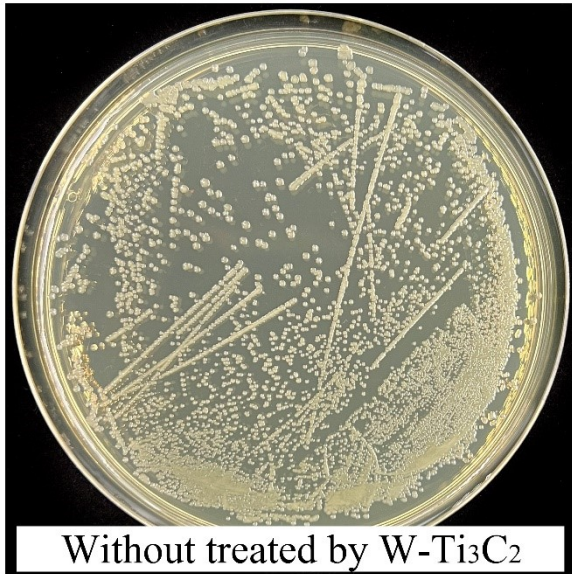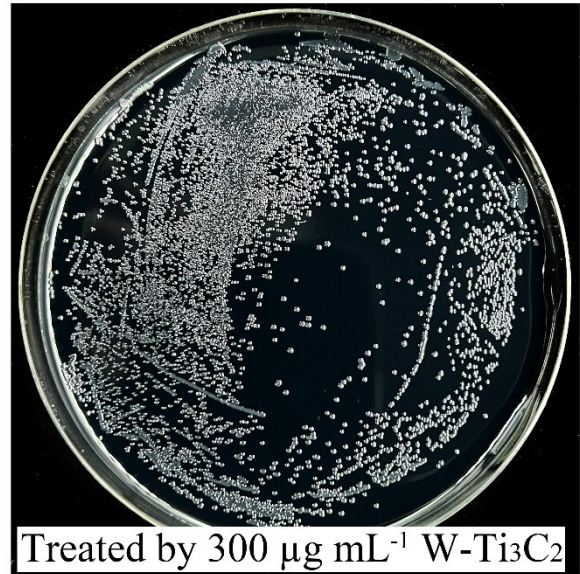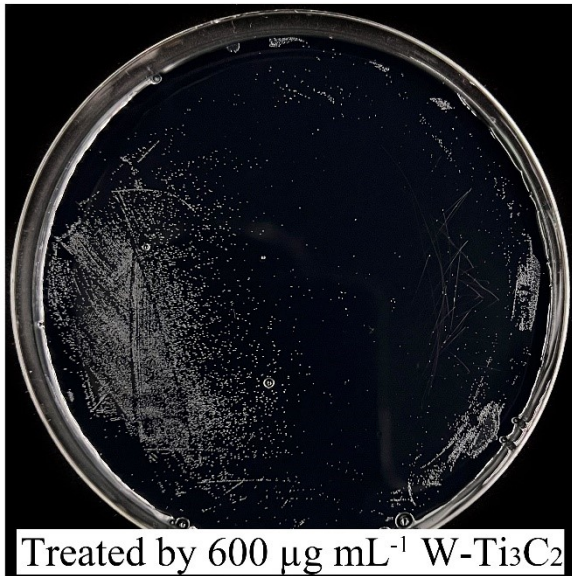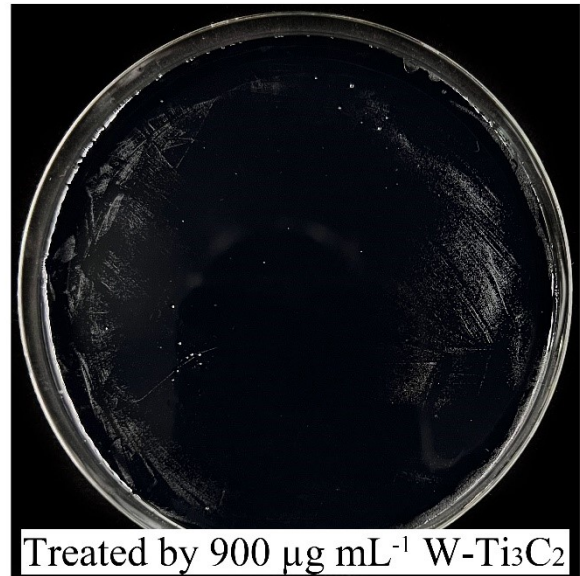

**Fig. S11** Photographs of *E. coli* incubated in non-W-Ti<sub>3</sub>C<sub>2</sub>-treated and W-Ti<sub>3</sub>C<sub>2</sub>-treated LB media for 12 hours.



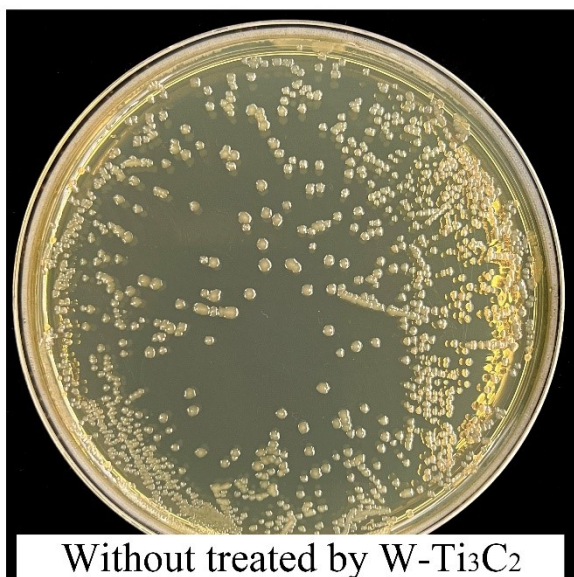

Without treated by W-Ti<sub>3</sub>C<sub>2</sub>

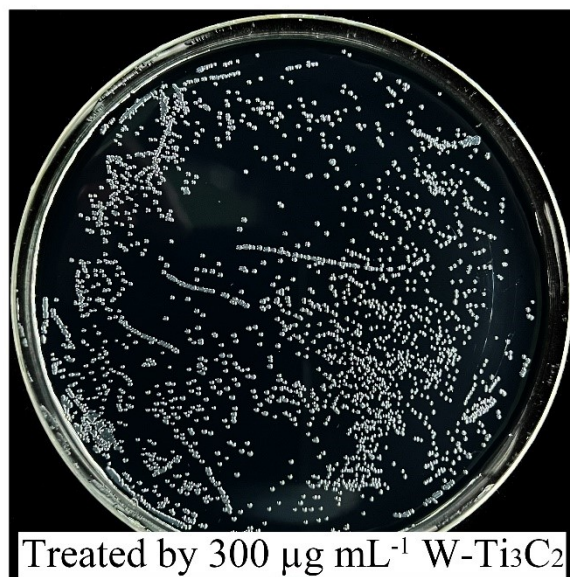

Treated by 300 µg mL<sup>-1</sup> W-Ti<sub>3</sub>C<sub>2</sub>

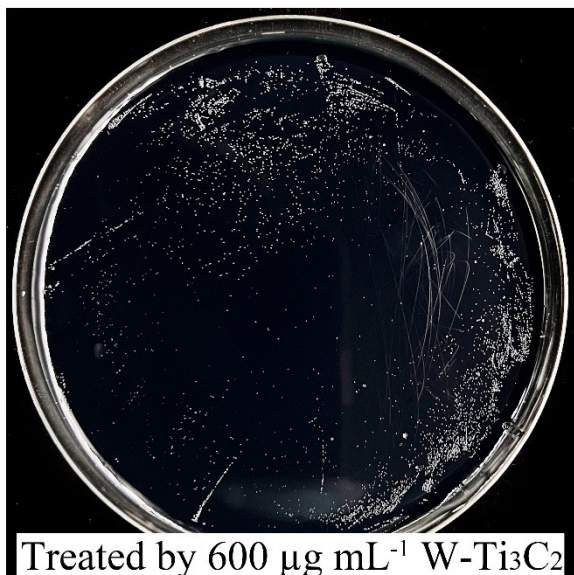

Treated by 600 µg mL<sup>-1</sup> W-Ti<sub>3</sub>C<sub>2</sub>

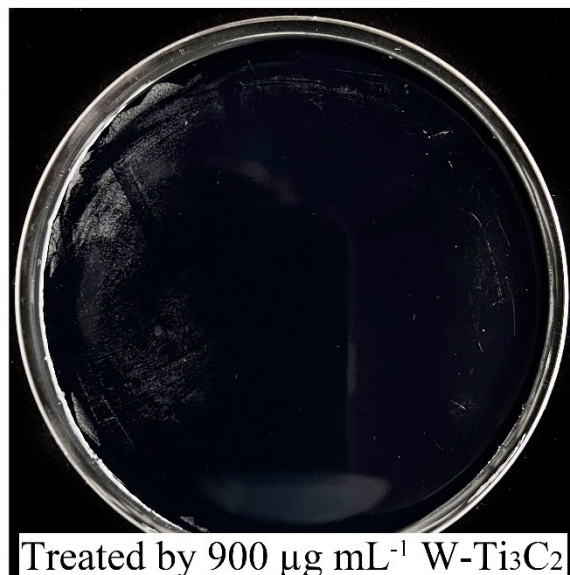

Treated by 900 µg mL<sup>-1</sup> W-Ti<sub>3</sub>C<sub>2</sub>

**Fig. S12** Photographs of the first replicate samples of *E. coli* incubated in non-W-Ti<sub>3</sub>C<sub>2</sub>-treated and W-Ti<sub>3</sub>C<sub>2</sub>-treated LB media for 12 hours.



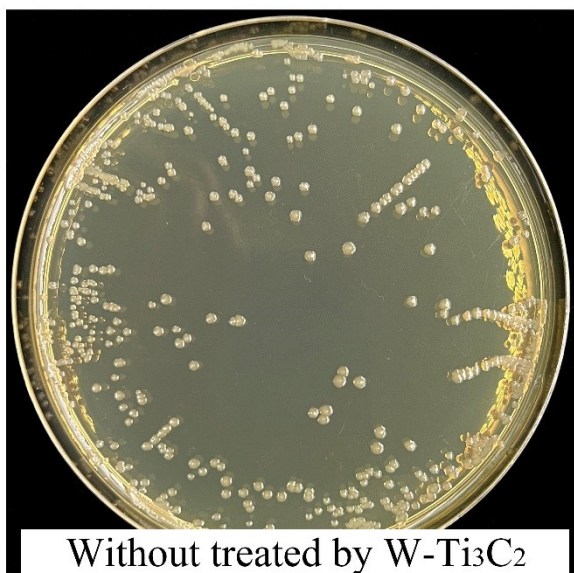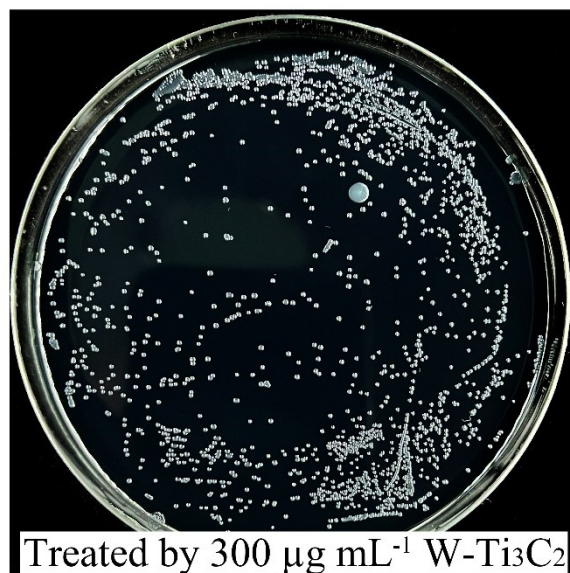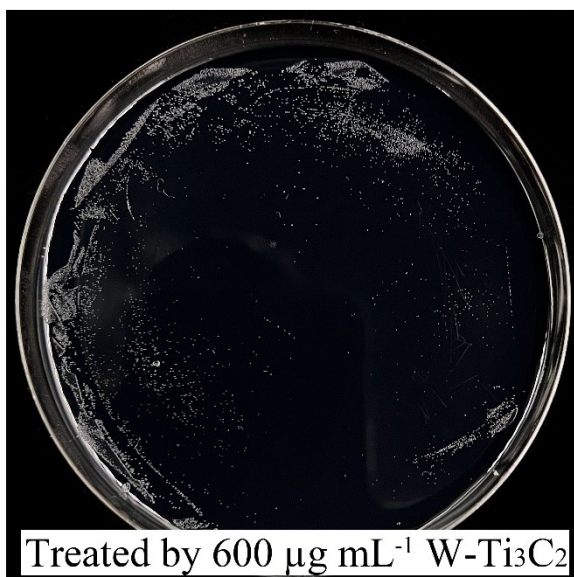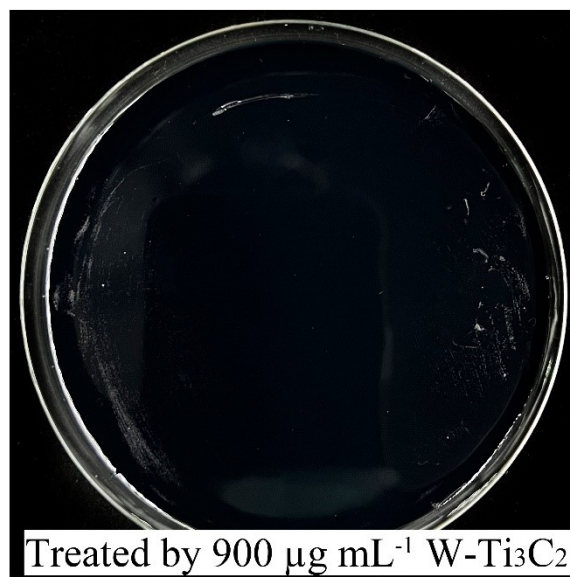

**Fig. S13** Photographs of the second replicate samples of *E. coli* incubated in non-W-Ti<sub>3</sub>C<sub>2</sub>-treated and W-Ti<sub>3</sub>C<sub>2</sub>-treated LB media for 12 hours.

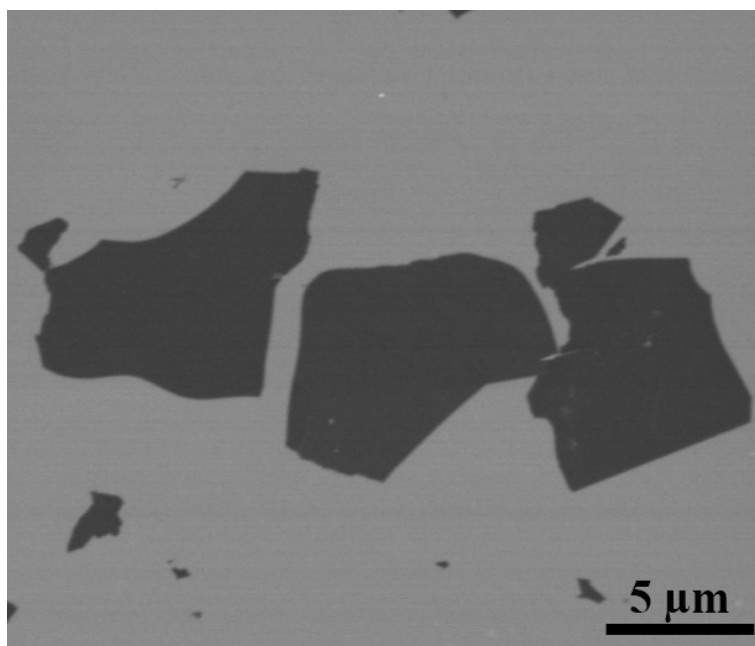

**Fig. S14** SEM image of W-Ti<sub>3</sub>C<sub>2</sub> prepared through conventional wet chemical etching method.

**Table S1.** Energy consumption of ECO-ME and conventional wet chemical etching methods.

| <b>Preparation methods</b>         | <b>Equipment Model</b>                  | <b>Working hours (h)</b> | <b>Equipment-rated power (kW)</b> | <b>Electricity consumption (kW*h)</b> |
|------------------------------------|-----------------------------------------|--------------------------|-----------------------------------|---------------------------------------|
| <b>Wet-chemical etching method</b> | Heidolph® Hei-Connect Magnetic Stirrers | 30                       | 0.8                               | 24                                    |
| <b>ECO-ME method</b>               | MITR® YXQM-0.4L                         | 2                        | 0.55                              | 1.1                                   |

**Table S2.** Elemental composition of the pristine MAX phase and E-Ti<sub>3</sub>C<sub>2</sub>.

| <b>Sample</b>                        | <b>Element (atomic%)</b> |          |           |           |          |
|--------------------------------------|--------------------------|----------|-----------|-----------|----------|
|                                      | <b>C</b>                 | <b>O</b> | <b>Ti</b> | <b>Al</b> | <b>F</b> |
| <b>Pristine MAX Phase</b>            | 37.65                    | 37.45    | 14.76     | 10.14     | -        |
| <b>E-Ti<sub>3</sub>C<sub>2</sub></b> | 42.25                    | 19.14    | 27.64     | -         | 10.97    |



**Table S3.** Summary of XPS peak fitting values for the prepared E-Ti<sub>3</sub>C<sub>2</sub> MXene

| Region       | Binding energy (eV) | Assigned to                       | Reference |
|--------------|---------------------|-----------------------------------|-----------|
| <b>Ti 2p</b> | 455.0               | Ti-C                              | 1         |
|              | 456.0               | (OH)-Ti <sup>2+</sup> -C          | 2         |
|              | 457.2 (462.4)       | (OH)-Ti <sup>3+</sup> -C          | 3 4       |
|              | 458.5 (463.9)       | TiO <sub>2</sub>                  | 5, 6      |
|              | 459.4               | TiO <sub>2-x</sub> F <sub>x</sub> | 7         |
|              | 461.1               | C-Ti-(O/OH)                       | 8         |
| <b>C 1s</b>  | 281.8               | C-Ti                              | 8         |
|              | 284.6               | C-C                               | 8         |
|              | 286.7               | C-O                               | 8         |
|              | 288.39              | O-C=O                             | 8         |
| <b>O 1s</b>  | 529.7               | TiO <sub>2</sub>                  | 9         |
|              | 530.8               | TiO <sub>2-x</sub> F <sub>x</sub> | 10        |
|              | 532.2               | C-Ti-(OH) <sub>x</sub>            | 11        |
| <b>F 1s</b>  | 684.9               | C-Ti-F                            | 8         |
|              | 685.9               | TiO <sub>2-x</sub> F <sub>x</sub> | 10        |

## References

- 1 V. Schier, H. J. Michel and J. Halbritter, *Fresenius J. Anal. Chem.*, 1993, **346**, 227-232.
- 2 X. Wang, F. You, L. Wu, R. Ji, X. Wen, B. Fan, G. Tong, D. Chen and W. Wu, *J. Alloys Compd.*, 2022, **918**, 165740.
- 3 S. Ding, X. Jin, B. Wang, Z. Niu, J. Ma, X. Zhao, M. Yang, C. Wang, Q. Shi and X. Li, *ACS Appl. Nano Mater.*, 2023, **6**, 11810-11821.
- 4 G. S. Park, D. H. Ho, B. Lyu, S. Jeon, D. Y. Ryu, D. W. Kim, N. Lee, S. Kim, Y. J. Song, S. B. Jo and J. H. Cho, *Sci. Adv.*, **8**, 5299.
- 5 S. Ahn, T.-H. Han, K. Maleski, J. Song, Y.-H. Kim, M.-H. Park, H. Zhou, S. Yoo, Y. Gogotsi and T.-W. Lee, *Adv. Mater.*, 2020, **32**, 2000919.
- 6 Z. Fan, Y. Wang, Z. Xie, X. Xu, Y. Yuan, Z. Cheng and Y. Liu, *Nanoscale*, 2018, **10**, 9642-9652.
- 7 A. Pazniak, P. Bazhin, N. Shplis, E. Kolesnikov, I. Shchetinin, A. Komissarov, J. Polcak, A. Stolin and D. Kuznetsov, *Mater. Des.*, 2019, **183**, 108143.
- 8 V. Natu, M. Benchakar, C. Canaff, A. Habrioux, S. Célérier and M. W. Barsoum, *Matter*, 2021, **4**, 1224-1251.
- 9 U. Diebold and T. E. Madey, *Surf. Sci. Spectra*, 1996, **4**, 227-231.
- 10 T. Tanuma, H. Okamoto, K. Ohnishi, S. Morikawa and T. Suzuki, *Catal. Letters*, 2010, **136**, 77-82.
- 11 S. Yamamoto, H. Bluhm, K. Andersson, G. Ketteler, H. Ogasawara, M. Salmeron and A. Nilsson, *J. Condens. Matter Phys.*, 2008, **20**, 184025.
